# Supplementary material for: Multielemental determination in sugarcane products from the southern region of Brazil by microwave induced plasma optical emission spectrometry after acid decomposition with a reflux system
Source: Royal Society of Chemistry journal article supplement (doi:10.1039/c9ay02675d), 2020-01-01
Supplement: c9ay02675d1.pdf [file c9ay02675d1.pdf]

## Electronic Supplementary Information

### **Multielemental determination in sugarcane products from the Southern region of Brazil by microwave induced plasma optical emission spectrometry after acid decomposition with reflux system**

**Maicon Renato Ferreira Sampaio<sup>a</sup>, Meibel Teixeira Lisboa<sup>b</sup>, Janaína Garcia Timm<sup>b</sup>,  
Anderson Schwingel Ribeiro<sup>b</sup>, Mariana Antunes Vieira<sup>b\*</sup>, Deborah Murowaniecki Otero<sup>c</sup>  
and Rui Carlos Zambiasi<sup>a</sup>**

---

*<sup>a</sup>Programa de Pós-Graduação em Ciência e Tecnologia de Alimentos, Universidade Federal de Pelotas (UFPel), 96010-900 Capão do Leão-RS*

*<sup>b</sup>Laboratório de Metrologia Química (LabMeQui), Programa de Pós-graduação em Química, Universidade Federal de Pelotas (UFPel), 96010-900 Capão do Leão-RS, Brazil.  
E-mail [maryanavieira@hotmail.com](mailto:maryanavieira@hotmail.com)*

*<sup>c</sup>Universidade Federal da Bahia, Salvador, BA, Brasil – CEP 40110-970*

**Table S1.** Physical and chemical parameters of sugarcane products (n = 3)

| <b>Samples</b> | <b>Refined</b> | <b>Crystal</b> | <b>Demerara</b> | <b>Brown</b> | <b>“Rapadura”</b> | <b>Molasses</b> |
|----------------|----------------|----------------|-----------------|--------------|-------------------|-----------------|
| Moisture (%)   | 0.27 ± 0.02    | 0.06 ± 0.01    | 0.10 ± 0.01     | 1.94 ± 0.03  | 10.4 ± 0.1        | 27.7 ± 1.3      |
| Ashes (%)      | 0.01 ± 0.01    | 0.01 ± 0.01    | 0.06 ± 0.01     | 0.46 ± 0.01  | 0.35 ± 0.02       | 0.55 ± 0.01     |
| pH             | 6.02 ± 0.05    | 6.67 ± 0.01    | 6.79 ± 0.01     | 6.81 ± 0.01  | 4.90 ± 0.01       | 5.32 ± 0.01     |

**Mean concentration ± standard deviation**

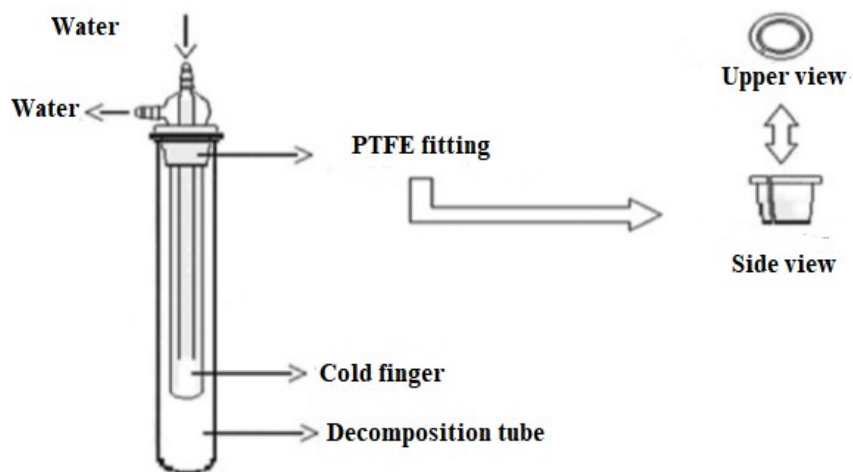

**Figure S1.** Schematic representative of the cold finger system with water circulation (adapted)<sup>1,2</sup>

## Notes and references

1. E. Q. Oreste, A. Jesus, R. M. Oliveira, M. M. Silva, M. A. Vieira and A. S. Ribeiro, *Microchem. J.*, 2013, **109**, 5.
2. A. C. A. Pinheiro, M. T. Lisboa, A. S. Ribeiro, A. M. Nunes and A. Yamasaki, *Quim. Nova*. 2014, **37**, 6.
